# Supplementary material for: Transcriptional signature of durable effector T cells elicited by a replication defective HCMV vaccine
Source: PubMed Central journal article supplement (PMC10984989; doi:10.1038/s41541-024-00860-w), 2024-04-01
Supplement: 41541_2024_860_MOESM7_ESM.pdf [file 41541_2024_860_MOESM7_ESM.pdf]

## Reporting Summary

Nature Portfolio wishes to improve the reproducibility of the work that we publish. This form provides structure for consistency and transparency in reporting. For further information on Nature Portfolio policies, see our [Editorial Policies](#) and the [Editorial Policy Checklist](#).

### Statistics

For all statistical analyses, confirm that the following items are present in the figure legend, table legend, main text, or Methods section.

- | n/a                                 | Confirmed                                                                                                                                                                                                                                                                                      |
|-------------------------------------|------------------------------------------------------------------------------------------------------------------------------------------------------------------------------------------------------------------------------------------------------------------------------------------------|
| <input type="checkbox"/>            | <input checked="" type="checkbox"/> The exact sample size ( $n$ ) for each experimental group/condition, given as a discrete number and unit of measurement                                                                                                                                    |
| <input type="checkbox"/>            | <input checked="" type="checkbox"/> A statement on whether measurements were taken from distinct samples or whether the same sample was measured repeatedly                                                                                                                                    |
| <input type="checkbox"/>            | <input checked="" type="checkbox"/> The statistical test(s) used AND whether they are one- or two-sided<br><i>Only common tests should be described solely by name; describe more complex techniques in the Methods section.</i>                                                               |
| <input checked="" type="checkbox"/> | <input type="checkbox"/> A description of all covariates tested                                                                                                                                                                                                                                |
| <input type="checkbox"/>            | <input checked="" type="checkbox"/> A description of any assumptions or corrections, such as tests of normality and adjustment for multiple comparisons                                                                                                                                        |
| <input type="checkbox"/>            | <input checked="" type="checkbox"/> A full description of the statistical parameters including central tendency (e.g. means) or other basic estimates (e.g. regression coefficient) AND variation (e.g. standard deviation) or associated estimates of uncertainty (e.g. confidence intervals) |
| <input type="checkbox"/>            | <input checked="" type="checkbox"/> For null hypothesis testing, the test statistic (e.g. $F$ , $t$ , $r$ ) with confidence intervals, effect sizes, degrees of freedom and $P$ value noted<br><i>Give <math>P</math> values as exact values whenever suitable.</i>                            |
| <input checked="" type="checkbox"/> | <input type="checkbox"/> For Bayesian analysis, information on the choice of priors and Markov chain Monte Carlo settings                                                                                                                                                                      |
| <input checked="" type="checkbox"/> | <input type="checkbox"/> For hierarchical and complex designs, identification of the appropriate level for tests and full reporting of outcomes                                                                                                                                                |
| <input checked="" type="checkbox"/> | <input type="checkbox"/> Estimates of effect sizes (e.g. Cohen's $d$ , Pearson's $r$ ), indicating how they were calculated                                                                                                                                                                    |

*Our web collection on [statistics for biologists](#) contains articles on many of the points above.*

### Software and code

Policy information about [availability of computer code](#)

**Data collection** For scRNA-seq, read preprocessing, alignment, quantification, empty droplet removal, and sample aggregation for the 5' expression data were performed using 10x Genomics Cell Ranger pipelines (v6.0.1). The longitudinal TCR beta sequence data was processed using the Cogent NGS Immune Profiler software. TCR CDR3 $\beta$  sequence clusters and motifs were identified using GIANA and GLIPH2. Please see details in the method section.

**Data analysis** Code supporting this study is available at the GitHub repository <https://github.com/djhshih/analysis-v160>

For manuscripts utilizing custom algorithms or software that are central to the research but not yet described in published literature, software must be made available to editors and reviewers. We strongly encourage code deposition in a community repository (e.g. GitHub). See the Nature Portfolio [guidelines for submitting code & software](#) for further information.

### Data

Policy information about [availability of data](#)

All manuscripts must include a [data availability statement](#). This statement should provide the following information, where applicable:

- Accession codes, unique identifiers, or web links for publicly available datasets
- A description of any restrictions on data availability
- For clinical datasets or third party data, please ensure that the statement adheres to our [policy](#)

The scRNA-seq and scTCR-seq data, as well as TCR profiling data, in this study have been deposited in the Sequence Read Archive with accession numbers

PRJNA832855 and PRJNA832878. All other relevant data supporting the findings of this study are available within the article and its Supplementary data files, or from the corresponding authors upon reasonable request.

## Research involving human participants, their data, or biological material

Policy information about studies with [human participants or human data](#). See also policy information about [sex, gender \(identity/presentation\), and sexual orientation](#) and [race, ethnicity and racism](#).

|                                                                    |                                                                                                                                                                                                                                                                                                                                                                                                                                                                                                                                                                                                                                                                                                                                                                                                                                                                                                                             |
|--------------------------------------------------------------------|-----------------------------------------------------------------------------------------------------------------------------------------------------------------------------------------------------------------------------------------------------------------------------------------------------------------------------------------------------------------------------------------------------------------------------------------------------------------------------------------------------------------------------------------------------------------------------------------------------------------------------------------------------------------------------------------------------------------------------------------------------------------------------------------------------------------------------------------------------------------------------------------------------------------------------|
| Reporting on sex and gender                                        | Not applicable                                                                                                                                                                                                                                                                                                                                                                                                                                                                                                                                                                                                                                                                                                                                                                                                                                                                                                              |
| Reporting on race, ethnicity, or other socially relevant groupings | Not applicable                                                                                                                                                                                                                                                                                                                                                                                                                                                                                                                                                                                                                                                                                                                                                                                                                                                                                                              |
| Population characteristics                                         | Healthy HCMV seronegative women at 16~35 years of age                                                                                                                                                                                                                                                                                                                                                                                                                                                                                                                                                                                                                                                                                                                                                                                                                                                                       |
| Recruitment                                                        | This study is a sub-study under V160-002 clinical trial. CMV-seronegative (assessed by LIAISON CMV IgG immunoassay [DiaSorin, Saluggia, Italy]), non-pregnant women of childbearing potential, aged 16–35 years, were eligible to participate in the study. Other inclusion criteria included being deemed healthy on the basis of medical history and physical examination and having exposure to children aged 5 years or younger at home or work. Eligible participants agreed to avoid becoming pregnant until 4 weeks after the last dose of V160 or placebo. Key exclusion criteria included: hypersensitivity to a vaccine component, known or suspected impairment of immunological function, recent febrile illness, or previous receipt of a CMV vaccine. Please see other details in the publication <a href="https://doi.org/10.1016/S1473-3099(23)00343-2">https://doi.org/10.1016/S1473-3099(23)00343-2</a> . |
| Ethics oversight                                                   | The protocol was reviewed and approved by the Western Institutional Review Board, Inc., and the Institutional Review Board of the University of Texas Medical Branch.                                                                                                                                                                                                                                                                                                                                                                                                                                                                                                                                                                                                                                                                                                                                                       |

Note that full information on the approval of the study protocol must also be provided in the manuscript.

## Field-specific reporting

Please select the one below that is the best fit for your research. If you are not sure, read the appropriate sections before making your selection.

Life sciences  Behavioural & social sciences  Ecological, evolutionary & environmental sciences

For a reference copy of the document with all sections, see [nature.com/documents/nr-reporting-summary-flat.pdf](https://nature.com/documents/nr-reporting-summary-flat.pdf)

## Life sciences study design

All studies must disclose on these points even when the disclosure is negative.

|                 |                                                                                                                                                                                                                                                                                                                                                                                                                                                                                                                     |
|-----------------|---------------------------------------------------------------------------------------------------------------------------------------------------------------------------------------------------------------------------------------------------------------------------------------------------------------------------------------------------------------------------------------------------------------------------------------------------------------------------------------------------------------------|
| Sample size     | Twenty-one participants enrolled at the UTMB site participated in the T-cells study. 8 subjects in 2-dose V160 group, 6 subjects in 3-dose V160 group and 4 subjects in placebo group made it through month 7; 7 subjects in 2-dose V160 group, 5 subjects in 3-dose V160 group and 4 subjects in placebo group made it through month 9 for collection of PBMCs; 5 subjects in 2-dose V160 group, 5 subjects in 3-dose V160 group and 3 subjects in placebo group made it through month 18 for collection of PBMCs. |
| Data exclusions | No data were excluded from the analysis.                                                                                                                                                                                                                                                                                                                                                                                                                                                                            |
| Replication     | The flow cytometry, ELISA and neutralization experiments have been performed twice with similar results. ScRNA-seq and blood RNA-seq was done one time.                                                                                                                                                                                                                                                                                                                                                             |
| Randomization   | Investigators and site staff enrolled participants using central randomisation via an interactive response technology system in blocks of six for assignment to vaccination groups. Participants were randomly assigned 1:1:1 to one of the three groups.                                                                                                                                                                                                                                                           |
| Blinding        | Participants and Investigators were double blinded for the V160-002 clinical trial.                                                                                                                                                                                                                                                                                                                                                                                                                                 |

## Reporting for specific materials, systems and methods

We require information from authors about some types of materials, experimental systems and methods used in many studies. Here, indicate whether each material, system or method listed is relevant to your study. If you are not sure if a list item applies to your research, read the appropriate section before selecting a response.

## Materials &amp; experimental systems

| n/a                                 | Involvement                                               |
|-------------------------------------|-----------------------------------------------------------|
| <input type="checkbox"/>            | <input checked="" type="checkbox"/> Antibodies            |
| <input type="checkbox"/>            | <input checked="" type="checkbox"/> Eukaryotic cell lines |
| <input checked="" type="checkbox"/> | <input type="checkbox"/> Palaeontology and archaeology    |
| <input checked="" type="checkbox"/> | <input type="checkbox"/> Animals and other organisms      |
| <input checked="" type="checkbox"/> | <input type="checkbox"/> Clinical data                    |
| <input checked="" type="checkbox"/> | <input type="checkbox"/> Dual use research of concern     |
| <input checked="" type="checkbox"/> | <input type="checkbox"/> Plants                           |

## Methods

| n/a                                 | Involvement                                        |
|-------------------------------------|----------------------------------------------------|
| <input checked="" type="checkbox"/> | <input type="checkbox"/> ChIP-seq                  |
| <input type="checkbox"/>            | <input checked="" type="checkbox"/> Flow cytometry |
| <input checked="" type="checkbox"/> | <input type="checkbox"/> MRI-based neuroimaging    |

## Antibodies

|                 |                                                                                                                                                                                                                                                                                                                                                                                          |
|-----------------|------------------------------------------------------------------------------------------------------------------------------------------------------------------------------------------------------------------------------------------------------------------------------------------------------------------------------------------------------------------------------------------|
| Antibodies used | Anti-CD3-ECD (Cat: IM2705U, BECKMAN COULTER), anti-CD4-AF700 (Cat: 566318, BD), anti-CD8-BUV395 (Cat: 563798, BD), anti-CD45RO-PE (Cat: 12-0457-42, Invitrogen), anti-TNF- $\alpha$ -PE-Cy7 (Cat: 557647, BD), anti-IFN- $\gamma$ -V500 (Cat: 561980, BD), anti-CD107a-APC H7 (Cat: 561343, BD), and anti-IL-2-APC (Cat: 341116, BD), and anti-CD197(CCR7)-FITC (Cat: 353216, BioLegend) |
| Validation      | All antibodies used in this study were commercial antibodies that have been well validated. Please see details on the website.                                                                                                                                                                                                                                                           |

## Eukaryotic cell lines

Policy information about [cell lines and Sex and Gender in Research](#)

|                                                                      |                                                           |
|----------------------------------------------------------------------|-----------------------------------------------------------|
| Cell line source(s)                                                  | ARPE-19 cells, ATCC (CRL-230)                             |
| Authentication                                                       | The cell line was not authenticated.                      |
| Mycoplasma contamination                                             | The cell line was not tested for mycoplasma contamination |
| Commonly misidentified lines<br>(See <a href="#">ICLAC</a> register) | None                                                      |

## Plants

|                       |                |
|-----------------------|----------------|
| Seed stocks           | Not applicable |
| Novel plant genotypes | Not applicable |
| Authentication        | Not applicable |

## Flow Cytometry

## Plots

Confirm that:

- The axis labels state the marker and fluorochrome used (e.g. CD4-FITC).
- The axis scales are clearly visible. Include numbers along axes only for bottom left plot of group (a 'group' is an analysis of identical markers).
- All plots are contour plots with outliers or pseudocolor plots.
- A numerical value for number of cells or percentage (with statistics) is provided.

## Methodology

|                    |                                                                                                                                                                                                                                                                                                            |
|--------------------|------------------------------------------------------------------------------------------------------------------------------------------------------------------------------------------------------------------------------------------------------------------------------------------------------------|
| Sample preparation | PBMCs were isolated from fresh blood or buffy coat using ACCUSPINTM system-Histopaque (Cat#A7054, Sigma) according to manufacturer's instructions. All PBMCs were frozen in cell freezing medium (Cat. Log 302-14681, BAMBANKER) at $1 \times 10^7$ cells/vial and stocked in liquid nitrogen until usage. |
| Instrument         | BD Aria II SORP cytometer                                                                                                                                                                                                                                                                                  |

|                           |                                                                                                                                                                                                                                                                                                                                                                                                                                                                                                                                                                                                                                                                                                                                                                                                                                                                                                                        |
|---------------------------|------------------------------------------------------------------------------------------------------------------------------------------------------------------------------------------------------------------------------------------------------------------------------------------------------------------------------------------------------------------------------------------------------------------------------------------------------------------------------------------------------------------------------------------------------------------------------------------------------------------------------------------------------------------------------------------------------------------------------------------------------------------------------------------------------------------------------------------------------------------------------------------------------------------------|
| Software                  | FlowJo software (V9.7.6)                                                                                                                                                                                                                                                                                                                                                                                                                                                                                                                                                                                                                                                                                                                                                                                                                                                                                               |
| Cell population abundance | The abundance of CD3+ T cells post sorting was >99%.                                                                                                                                                                                                                                                                                                                                                                                                                                                                                                                                                                                                                                                                                                                                                                                                                                                                   |
| Gating strategy           | CD4 T and CD8 T cells were identified by sequential gating as shown in Supplementary Fig 1a. Lymphocytes were identified by gating of SSC-A and FSC-A. Singlets were gated from lymphocyte using FSC-W and FSC-H and followed by gating for CD3+ live cells. The CD4 T cells and CD8 T cells were identified from live CD3+ T cells through gating of CD4 and CD8. Then, the CD4 T cells and CD8 T cells were analyzed for expression of four effector molecules (CD107a, IFN- $\gamma$ , IL-2, and TNF- $\alpha$ ) separately as shown in Supplementary Fig 1b-c. Effector phenotypes of CD4 T and CD8 T cells were determined by gating on expression of CCR7 and CD45RO as shown in Supplementary Fig 1d-e. For polyfunctional analysis, a Boolean combination gates was applied on four subpopulations of CD4 T (or CD8 T) cells that were gated on CD107A, IFN- $\gamma$ , IL-2 and TNF- $\alpha$ , respectively. |

Tick this box to confirm that a figure exemplifying the gating strategy is provided in the Supplementary Information.
