# Supplementary material for: Transcriptional signature of durable effector T cells elicited by a replication defective HCMV vaccine
Source: PubMed Central journal article supplement (PMC10984989; doi:10.1038/s41541-024-00860-w), 2024-04-01
Supplement: 41541_2024_860_MOESM8_ESM.pdf [file 41541_2024_860_MOESM8_ESM.pdf]

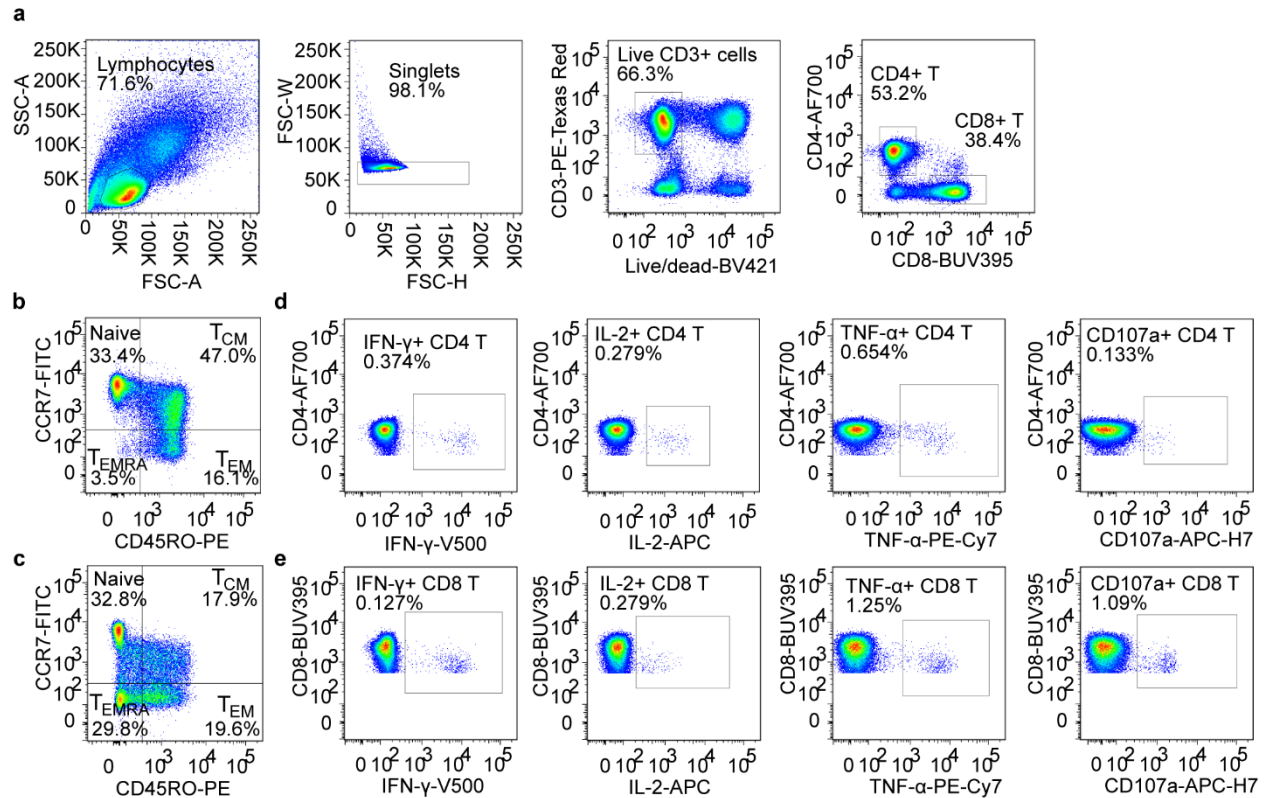

**Supplementary Fig 1.** Representative gating strategy of flow cytometry analysis. **a**, Sequential gating for CD4 T and CD8 T cells. The lymphocytes populations were identified from PBMCs based on gating of SSC-A and FSC-A. Singlets were gated from lymphocyte using FSC-W and FSC-H and followed by gating on CD3 and live/dead staining. The CD4 T cells and CD8 T cells were identified from live CD3<sup>+</sup> T cells through gating of CD4 and CD8. **b-c**, Differentiation status of **(b)** CD4 T and **(c)** CD8 T cells were identified by gating on CCR7 and CD45RO. **d-e**, Antigen specific **(d)** CD4 T and **(e)** CD8 T cells were identified by gating on four effector molecules (CD107a, IFN-γ, IL-2, and TNF-α) separately. The data shown were from pp65 stimulated PBMCs of a HCMV<sup>+</sup> Donor.

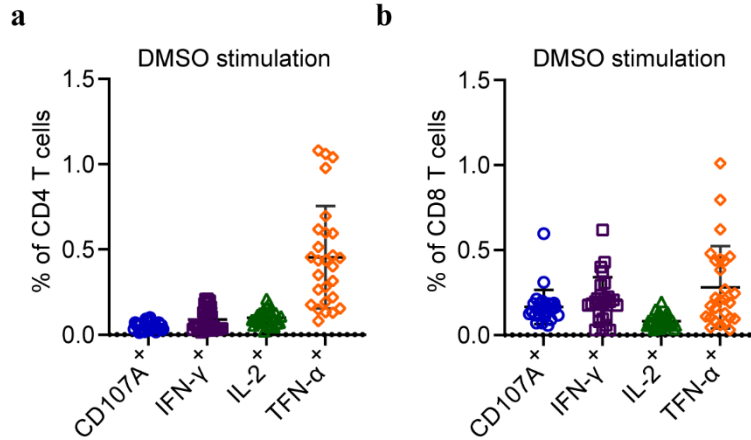

**Supplementary Fig 2. Background T-cell responses.** Percentages of (a) CD4 T and (b) CD8 T cells that were positive for the four effector molecules upon DMSO stimulation, respectively. Data were from a total of 27 individuals, including seven 2-dose subjects, five 3-dose subjects, four placebo subjects, seven HCMV<sup>+</sup> donors, and four HCMV<sup>-</sup> donors. Each symbol represents one individual. Bars indicate mean  $\pm$  standard deviation (SD).

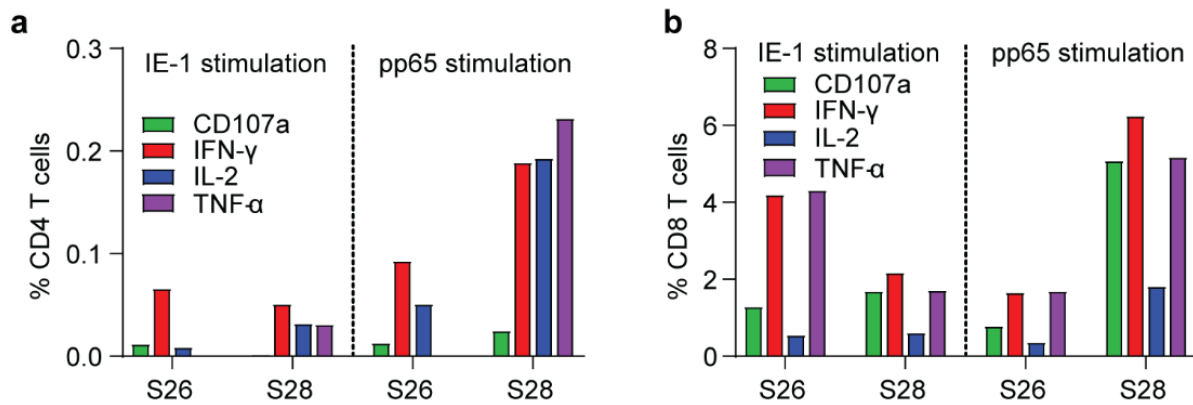

**Supplementary Fig 3. Top 2 T-cell responders after 3-dose V160 vaccination.** Percentages of IE-1 and pp65 responding (a) CD4 and (b) CD8 T cells that express four effector molecules (CD107a, IFN- $\gamma$ , IL-2, and TNF- $\alpha$ ) in month 9 PBMCs of subject 26 and 28 after background subtraction.

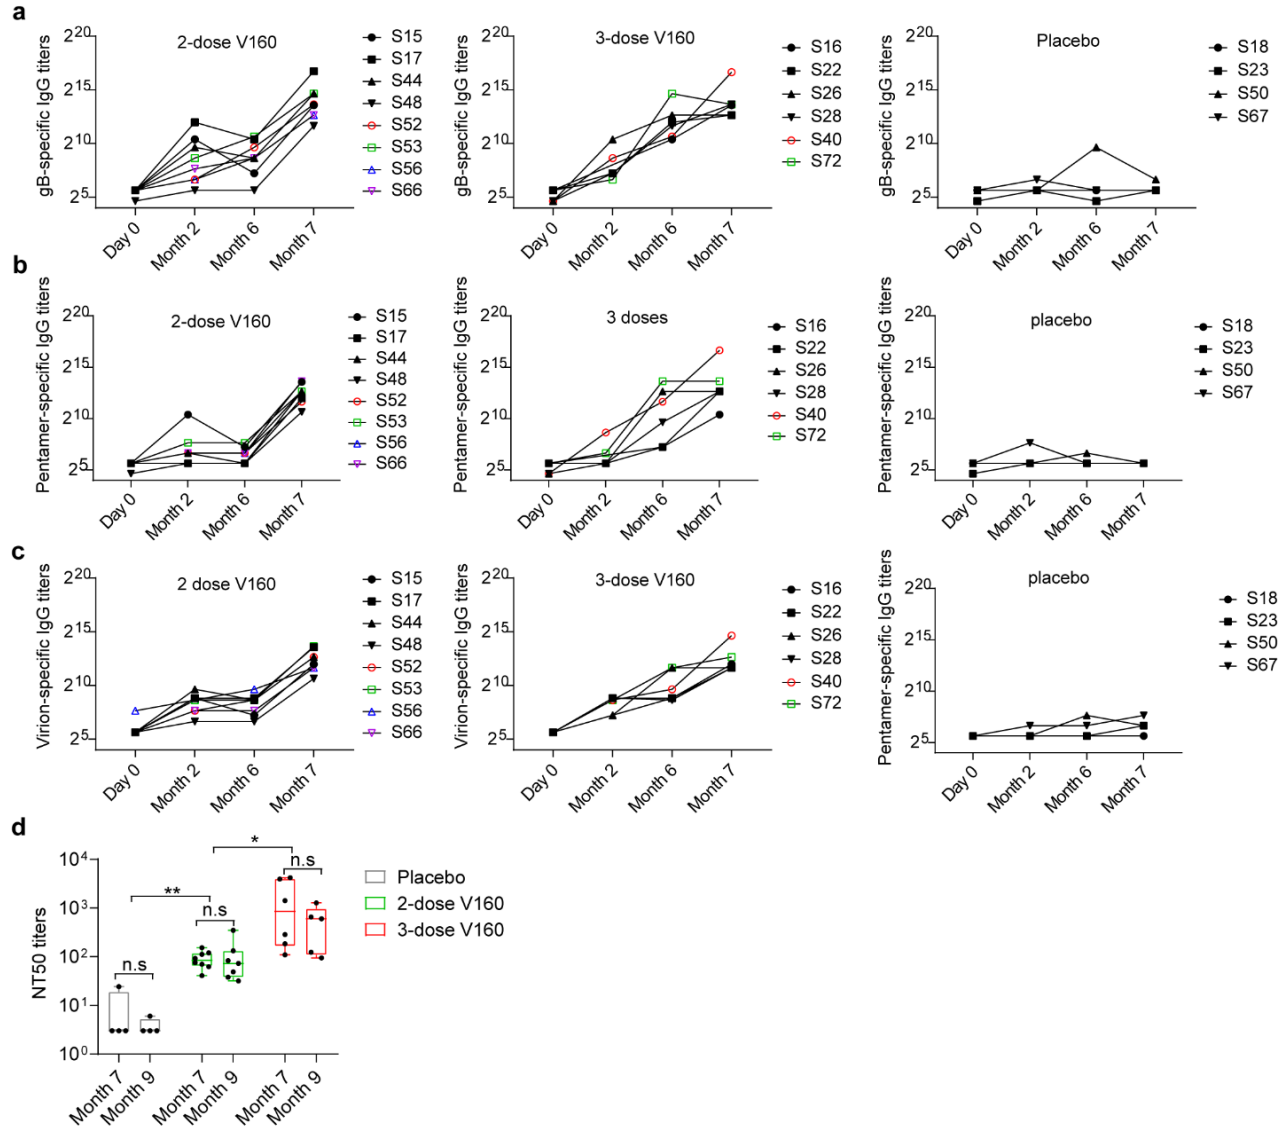

**Supplementary Fig 4. Kinetics of antibody responses elicited by V160 vaccination.** Serum samples available from 8 subjects in 2-dose V160 group, 6 subjects in 3-dose V160 group and 4 subjects in placebo group at day 1, month 2, month 6, and month 7 were determined for endpoint IgG titers for binding of (a) soluble gB, (b) soluble pentamer, and (c) HCMV virion by ELISA assay. d, The NT50 titers of month 7 and month 9 serum samples against HCMV strain AD169rev-GFP infection of ARPE-19 cells were determined. Data were plotted in a box and whiskers style showing median (center line), the first quartile, the third quartile together with all data points. Each dot represents one individual.

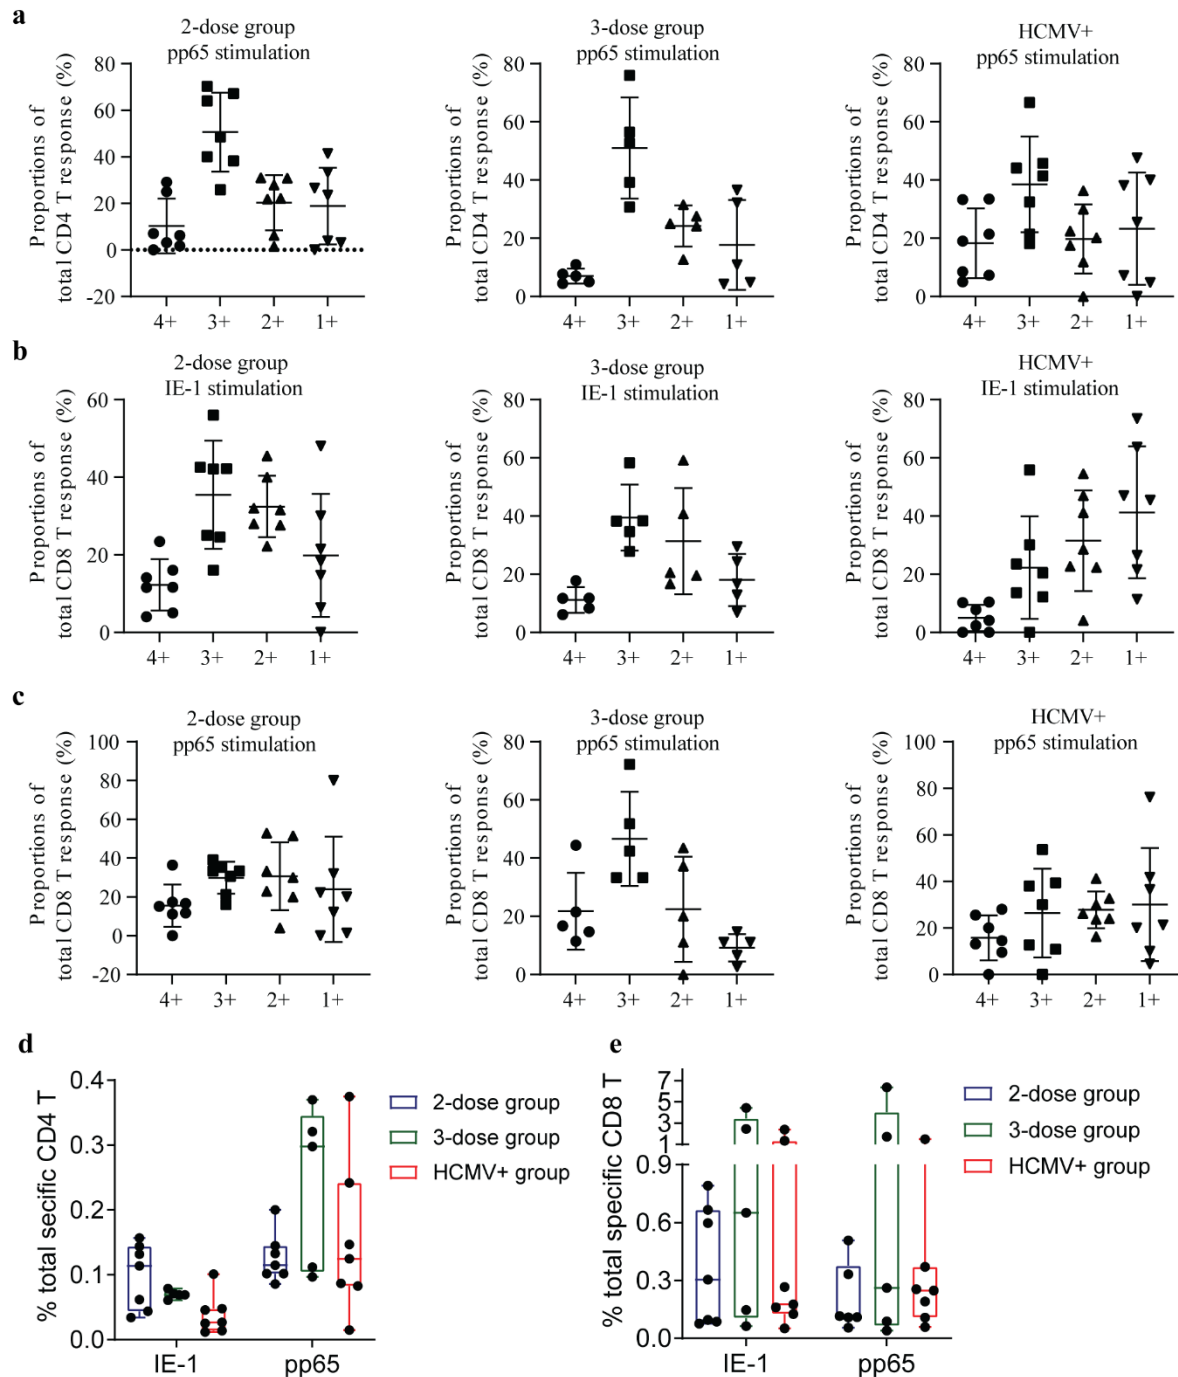

**Supplementary Fig 5. Combinatorial analysis of T-cell responses in month 9 PBMCs of V160 subjects and HCMV positive donors.** **a**, Proportions of total pp65 responsive CD4 T cells positive for 1, 2, 3, or 4 effector molecules (CD107a, IFN- $\gamma$ , IL-2, and TNF- $\alpha$ ) in three groups. **b-c**, Proportions of (b) IE-1 responsive and (c) pp65 responsive CD8 T cells positive for 1, 2, 3, or 4 effector molecules in three groups. Each symbol represents one individual. Bars indicate means  $\pm$  SD. **d-e**, Percentages of total IE-1 and pp65 responsive (d) CD4 T cells and (e) CD8 T cells in three groups. Data were shown in a box and whiskers style showing median (center line), the first quartile, the third quartile together with all data points. Each dot represents one individual.

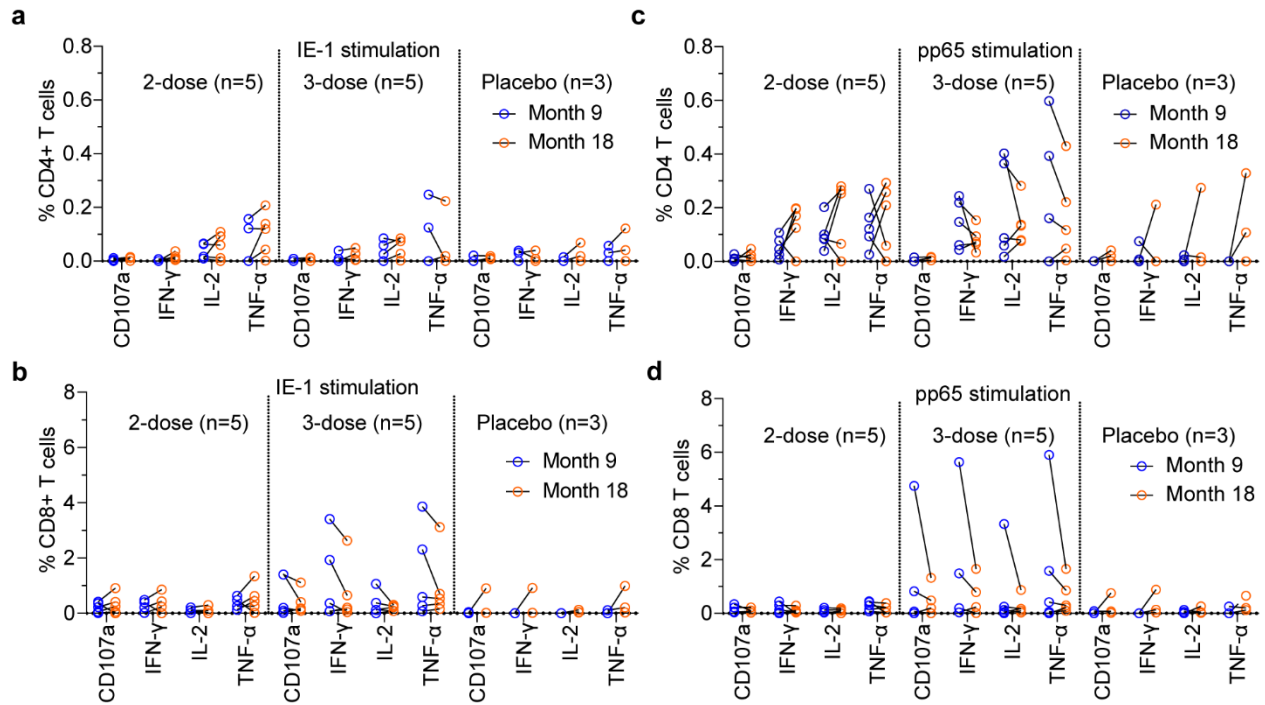

**Supplementary Fig 6. Functional comparison of virus-specific T cells in month 9 and month 18 PBMCs.** Month 9 and month 18 PBMCs that were available from the same 5 subjects in 2-dose group and 3-dose group, and the same 3 subjects in placebo group were analyzed side-by-side for IE-1 and pp65 specific T cell responses by ICS flow cytometry assay. **a, c**, The percentages of CD4 T cells that expressed each effector molecule (CD107a, IFN- $\gamma$ , IL-2, and TNF- $\alpha$ ) after IE-1 (**a**) and (**c**) pp65 stimulation were plotted, respectively. **b, d**, The percentages of CD8 T cells that expressed each effector molecule (CD107a, IFN- $\gamma$ , IL-2, and TNF- $\alpha$ ) after (**b**) IE-1 and (**d**) pp65 stimulation were plotted, respectively. All data were background subtracted in a sample matching manner. Each pair of connected circles represents the change of response from month 9 to month 18 in one individual.

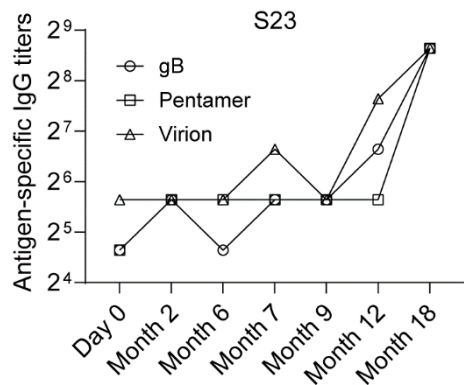

**Supplementary Fig 7. Kinetics of HCMV specific antibody responses in subject 23.** End-point titers of soluble gB, soluble pentamer and whole HCMV virion specific IgG antibodies in serum samples at indicated time points were determined by ELISA assay.

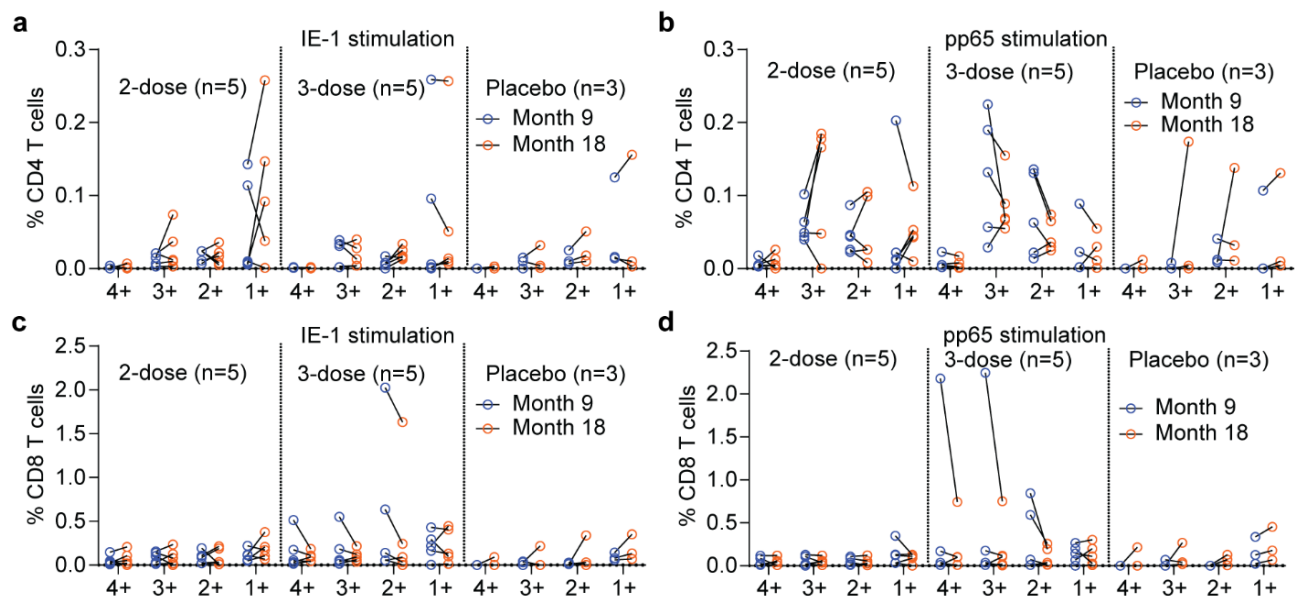

**Supplementary Fig 8. Combinatorial analysis of T-cell responses at month 9 and month 18.** The percentages of (a-b) CD4 T and (c-d) CD8 T cells that expressed 1, 2, 3 and 4 effector molecules (CD107a, IFN- $\gamma$ , IL-2, and TNF- $\alpha$ ) after (a, c) IE-1 and (b, d) pp65 stimulation in month 18 PBMCs (orange circle) were compared to those in month 9 PBMCs (blue circle). Available PBMCs samples from 5 subjects in 2-dose group, 5 subjects in 3-dose group, and 3 subjects in the placebo group were analyzed. All data were background subtracted in a sample matching manner. Each circle represents one individual.

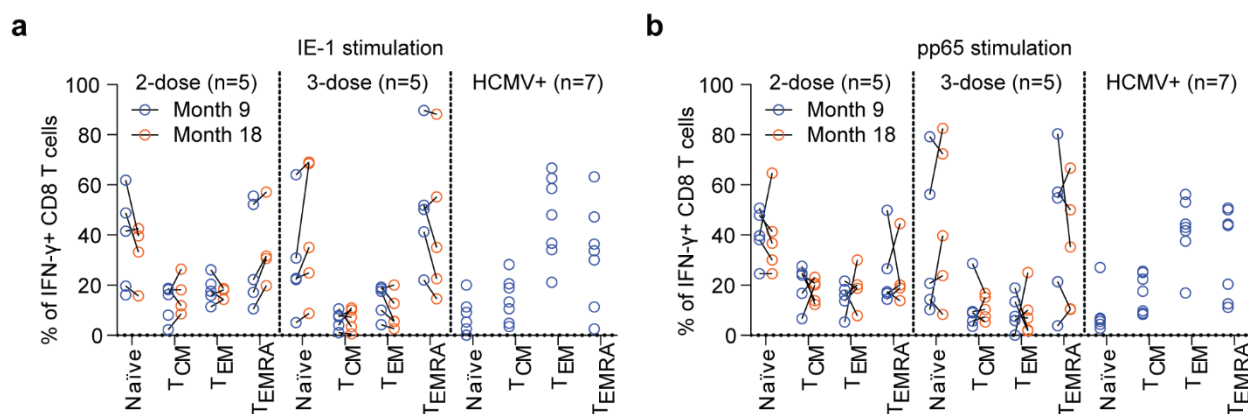

**Supplementary Fig 9. Memory phenotypes of IFN- $\gamma$ <sup>+</sup> CD8 T cells.** Distributions of four memory phenotypes among (a) IE-1 and (b) pp65 responding IFN- $\gamma$ <sup>+</sup> CD8 T cells in month 9 (blue circle) and month 18 PBMCs (orange circle), respectively. Data were from 5 subjects in 2-dose V160 group, 5 subjects in 3-dose V160 group, and PBMCs of seven HCMV<sup>+</sup> donors. Each circle represents one individual. Please be noted that M18 data of one 2-dose subject was absent due to none IFN- $\gamma$ <sup>+</sup> CD8 T response, and the unusually high proportions of naïve pp65 responding CD8 T cells of two 3-dose subjects are probably caused by background interference due to low level responses. Percentages of individual specific T-cell responses were shown in Supplementary Fig 6.

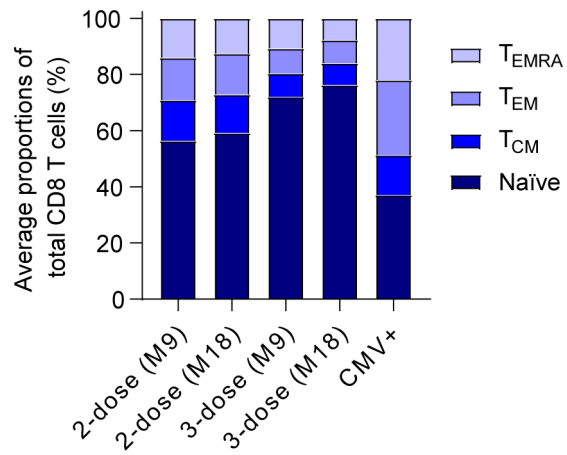

**Supplementary Fig 10.** Average proportions of four memory phenotypes among total CD8 T cells in 2-dose and 3-dose V160 subjects and seven HCMV<sup>+</sup> donors.
